# Supplementary material for: Differences in Exposure to Nicotine, Tobacco-Specific Nitrosamines, and Volatile Organic Compounds among Electronic Cigarette Users, Tobacco Smokers, and Dual Users from Three Countries
Source: PubMed Central journal article supplement (PMC7712026; doi:10.3390/toxics8040088), 2020-10-14
Supplement: toxics-08-00088-s001.pdf [file toxics-08-00088-s001.pdf]

# Differences in Exposure to Nicotine, Tobacco-Specific Nitrosamines, and Volatile Organic Compounds among Electronic Cigarette Users, Tobacco Smokers, and Dual Users from Three Countries

Danielle M. Smith, Lion Shahab, Benjamin C. Blount, Michal Gawron, Leon Kosminder, Andrzej Sobczak, Baoyun Xia, Connie S. Sosnoff, and Maciej L. Goniewicz

**Table S1:** Analytic Limits of Detection (LODs) for biomarkers of exposure to nicotine, tobacco-specific nitrosamines (TSNAs), and volatile organic compounds (VOCs).

| Parent Compound                                     | Biomarker                                           | Limit of detection (LOD)<br>ng/mL |
|-----------------------------------------------------|-----------------------------------------------------|-----------------------------------|
| Nicotine Metabolites                                |                                                     |                                   |
| Nicotine                                            | Nicotine Equivalence (nmol/mg)                      | ----                              |
|                                                     | <i>trans</i> -3'-Hydroxycotinine (HCTT)             | 0.030                             |
|                                                     | Cotinine (COTT)                                     | 0.030                             |
|                                                     | Nicotine (NICT)                                     | 10.5                              |
|                                                     | Cotinine N-oxide (COXT)                             | 2.02                              |
|                                                     | Nicotine 1'-oxide (NOXT)                            | 2.5                               |
|                                                     | Norcotinine (NCTT)                                  | 1.11                              |
|                                                     | Nornicotine (NNCT)                                  | 2.5                               |
| Anabasine (ANBT)                                    | Anabasine (ANBT)                                    | 0.51                              |
| Anatabine (ANTT)                                    | Anatabine (ANTT)                                    | 0.39                              |
| Tobacco Specific Nitrosamines (TSNAs)               |                                                     |                                   |
| 4-methylnitrosamino)-4-(3-pyridyl)-1-butanone (NNK) | 4-methylnitrosamino)-4-(3-pyridyl)-1-butanol (NNAL) | 0.0006                            |
| N'-nitrosoanabasine (NAB)                           | N'-nitrosoanabasine (NAB)                           | 0.0016                            |
| N'-nitrosoanatabine (NAT)                           | N'-nitrosoanatabine (NAT)                           | 0.004                             |
| Volatile Organic Compounds (VOCs)                   |                                                     |                                   |
| Acrolein                                            | N-Acetyl-S-(3-hydroxypropyl)-L-cysteine (3HPMA)     | 13.0                              |
|                                                     | N-Acetyl-S-(2-carboxyethyl)-L-cysteine (CEMA)       | 8.0                               |
|                                                     | N-Acetyl-S-(2-carbamoylethyl)-L-cysteine (AAMA)     | 2.2                               |

|                                               |                                                              |      |
|-----------------------------------------------|--------------------------------------------------------------|------|
| Acrylamide                                    | N-Acetyl-S-(2-carbamoyl-2-hydroxyethyl)-L-cysteine (GAMA)    | 9.4  |
| Acrylonitrile                                 | N-Acetyl-S-(2-cyanoethyl)-L-cysteine (CYMA)                  | 0.5  |
| Benzene                                       | N-Acetyl-S-(phenyl)-L-cysteine (PMA)                         | 0.6  |
| 1,3-Butadiene                                 | N-Acetyl-S-(4-hydroxy-2-buten-1-yl)-L-cysteine (MHBMA3)      | 0.6  |
|                                               | N-Acetyl-S-(3,4-dihydroxybutyl)-L-cysteine (DHBMA)           | 5.0  |
| Crotonaldehyde                                | N-Acetyl-S-(3-hydroxypropyl-1-methyl)-L-cysteine (HPMMA)     | 2.0  |
| Cyanide                                       | 2-Aminothiazoline-4-carboxylic acid (ATCA)                   | 5.5  |
| <i>N,N</i> -Dimethylformamide                 | N-Acetyl-S-( <i>N</i> -methylcarbamoyl)-L-cysteine (AMCC)    | 5.5  |
| Ethylene oxide, acrylonitrile, vinyl chloride | N-Acetyl-S-(2-hydroxyethyl)-L-cysteine (HEMA) <sup>***</sup> | 0.6  |
| Propylene oxide                               | N-Acetyl-S-(2-hydroxypropyl)-L-cysteine (2HPMA)              | 1.3  |
| Styrene                                       | Mandelic acid (MA)                                           | 12.0 |
| Styrene, ethylbenzene                         | Phenylglyoxylic acid (PGA)                                   | 12.0 |
| Toluene                                       | N-Acetyl-S-(benzyl)-L-cysteine (BMA)                         | 0.5  |
| Xylene                                        | 2-Methylhippuric acid (2MHA)                                 | 5.0  |
|                                               | 3- + 4-Methylhippuric acids (34MHA)                          | 8.0  |

**Table S2.** Biomarkers of exposure to nicotine and minor tobacco alkaloids in urine of e-cigarette users, tobacco smokers, dual users, and non-users (normalized for creatinine; adjusted geometric means, 95% confidence intervals).

| Parent Compound                            | Biomarker                               | Non-users (a)<br>(n=110)         | E-cigarette users (b)<br>(n=124)   | Dual users (c)<br>(n=95)          | Cigarette smokers (d)<br>(n=127)   |
|--------------------------------------------|-----------------------------------------|----------------------------------|------------------------------------|-----------------------------------|------------------------------------|
| Nicotine Metabolites (ng/mg creatinine)    |                                         |                                  |                                    |                                   |                                    |
| Nicotine                                   | Nicotine Equivalence (nmol/mg)          | 0.11 (0.09–0.14) <sup>bcd</sup>  | 45.1 (36.6–55.4) <sup>ad</sup>     | 37.4 (29.6–47.2) <sup>a</sup>     | 29.7 (24.2–36.3) <sup>ab</sup>     |
|                                            | <i>trans</i> -3'-Hydroxycotinine (HCTT) | 1.5 (1.1–1.9) <sup>bcd</sup>     | 34,029 (3171–5117) <sup>ad</sup>   | 23,076 (2346–4034) <sup>a</sup>   | 2,275 (1798–2879) <sup>ab</sup>    |
|                                            | Cotinine (COTT)                         | 1.0 (0.8–1.3) <sup>bcd</sup>     | 2,130 (1700–2669) <sup>ad</sup>    | 1,746 (1353–2253) <sup>a</sup>    | 1,376 (1103–1719) <sup>ab</sup>    |
|                                            | Nicotine (NICT)                         | 8.42 (6.62–10.70) <sup>bcd</sup> | 638 (508–800) <sup>ad</sup>        | 570 (441–737) <sup>a</sup>        | 393 (314–491) <sup>ab</sup>        |
|                                            | Cotinine N-oxide (COXT)                 | 1.57 (1.26–1.96) <sup>bcd</sup>  | 257.67 (209.3–317.1) <sup>ad</sup> | 1202.7 (160.2–256.4) <sup>a</sup> | 1162.9 (132.8–199.9) <sup>ab</sup> |
|                                            | Nicotine 1'-oxide (NOXT)                | 2.07 (1.60–2.67) <sup>bcd</sup>  | 616 (484–786) <sup>ad</sup>        | 551 (418–725) <sup>a</sup>        | 387 (305–491) <sup>ab</sup>        |
|                                            | Norcotinine (NCTT)                      | 0.84 (0.68–1.04) <sup>bcd</sup>  | 554.0 (44.2–65.7) <sup>a</sup>     | 52.5 (41.9–65.7) <sup>a</sup>     | 43.8 (36.0–53.2) <sup>a</sup>      |
|                                            | Nornicotine (NNCT)                      | 1.87 (1.53–2.26) <sup>bcd</sup>  | 33.8 (28.1–40.5) <sup>a</sup>      | 36.6 (29.7–45.1) <sup>a</sup>     | 31.0 (25.8–37.1) <sup>a</sup>      |
| Minor Tobacco Alkaloids (ng/mg creatinine) |                                         |                                  |                                    |                                   |                                    |
| Anabasine (ANBT)                           | Anabasine (ANBT)                        | 0.39 (0.31–0.48) <sup>bcd</sup>  | 1.96 (1.60–2.40) <sup>acd</sup>    | 3.30 (2.62–4.14) <sup>ab</sup>    | 3.46 (2.83–4.22) <sup>ab</sup>     |
| Anatabine (ANTT)                           | Anatabine (ANTT)                        | 0.31 (0.24–0.38) <sup>bcd</sup>  | 1.17 (0.92–1.47) <sup>acd</sup>    | 3.71 (2.85–4.83) <sup>ab</sup>    | 4.38 (3.48–5.50) <sup>ab</sup>     |

\*Superscript letters denote statistically significant differences between study groups (sidak adjusted  $p$ -value < 0.05). Geometric means are adjusted for age, sex, race, and country of residence.

**Table S3.** Biomarkers of exposure to tobacco specific nitrosamines (TSNAs) in urine of e-cigarette users, tobacco smokers, dual users, and non-users (normalized for creatinine; adjusted geometric means, 95% confidence intervals).

| Parent Compound                                          | Biomarker                                               | Non-users<br>(a)<br>(n = 110)       | E-cigarette users<br>(b) (n = 124) | Dual users (c)<br>(n = 95)             | Cigarette smokers<br>(d) (n = 127)     |
|----------------------------------------------------------|---------------------------------------------------------|-------------------------------------|------------------------------------|----------------------------------------|----------------------------------------|
| Tobacco-Specific Nitrosamines (TSNAs) (pg/mg creatinine) |                                                         |                                     |                                    |                                        |                                        |
| 4-methylnitrosamino)-4-(3-pyridyl)-<br>1-butanone (NNK)  | 4-methylnitrosamino)-4-(3-pyridyl)-<br>1-butanol (NNAL) | 1.05 (0.84–<br>1.30) <sup>bcd</sup> | 3.71 (3.02–4.57) <sup>acd</sup>    | 48.5 (38.4–<br>61.2) <sup>abd</sup>    | 82.9 (67.7–101.4) <sup>abc</sup>       |
| N'-nitrosoanabasine (NAB)                                | N'-nitrosoanabasine (NAB)                               | 1.29 (1.06–<br>1.55) <sup>cd</sup>  | 1.49 (1.25–1.79) <sup>cd</sup>     | 4.32 (3.53–<br>5.28) <sup>abd</sup>    | 8.11 (6.81–9.64) <sup>abc</sup>        |
| N'-nitrosoanatabine (NAT)                                | N'-nitrosoanatabine (NAT)                               | 3.16 (2.55–<br>3.91) <sup>cd</sup>  | 3.63 (2.96–4.44) <sup>cd</sup>     | 18.38 (14.64–<br>23.08) <sup>abd</sup> | 34.00 (27.90–<br>41.44) <sup>abc</sup> |

\*Superscript letters denote statistically significant differences between study groups (sidak adjusted *p*-value <0.05). Geometric means are adjusted for age, sex, race, and country of residence.

**Table S4.** Biomarkers of exposure from volatile organic compounds (VOCs) in urine of e-cigarette users, tobacco smokers, dual users, and non-users (normalized for creatinine; adjusted geometric means, 95% confidence intervals).

| Parent Compound                                      | Biomarker                                                    | Non-users<br>(a)<br>(n = 110)   | E-cigarette users<br>(b) (n = 124) | Dual users (c)<br>(n = 95)         | Cigarette smokers<br>(d) (n = 127) |
|------------------------------------------------------|--------------------------------------------------------------|---------------------------------|------------------------------------|------------------------------------|------------------------------------|
| Volatile Organic Compounds (VOCs) (ng/mg creatinine) |                                                              |                                 |                                    |                                    |                                    |
| Acrolein                                             | N-Acetyl-S-(3-hydroxypropyl)-L-cysteine (3HPMA)              | 282 (235–338) <sup>cd</sup>     | 257 (216–304) <sup>cd</sup>        | 405 (334–492) <sup>ab</sup>        | 414 (350–489) <sup>ab</sup>        |
|                                                      | N-Acetyl-S-(2-carboxyethyl)-L-cysteine (CEMA)                | 99.1 (84.7–115.9)               | 90.6 (78.1–105.0) <sup>cd</sup>    | 126.9 (107.3–150.1) <sup>ab</sup>  | 122.6 (105.9–141.8) <sup>b</sup>   |
| Acrylamide                                           | N-Acetyl-S-(2-carbamoylethyl)-L-cysteine (AAMA)              | 33.7 (28.8–39.3) <sup>cd</sup>  | 37.9 (32.7–44.0) <sup>cd</sup>     | 66.4 (56.2–78.4) <sup>ab</sup>     | 71.0 (61.4–82.1) <sup>ab</sup>     |
|                                                      | N-Acetyl-S-(2-carbamoyl-2-hydroxyethyl)-L-cysteine (GAMA)    | 11.7 (10.1–13.5) <sup>cd</sup>  | 11.4 (9.9–13.1) <sup>cd</sup>      | 18.7 (16.0–21.8) <sup>ab</sup>     | 19.9 (17.4–22.8) <sup>ab</sup>     |
| Acrylonitrile                                        | N-Acetyl-S-(2-cyanoethyl)-L-cysteine (CYMA)                  | 1.39 (1.12–1.74) <sup>bcd</sup> | 2.57 (2.08–3.16) <sup>acd</sup>    | 39.14 (30.91–49.57) <sup>abd</sup> | 61.08 (49.74–74.98) <sup>abc</sup> |
| Benzene                                              | N-Acetyl-S-(phenyl)-L-cysteine (PMA)                         | 0.86 (0.74–1.00)                | 0.87 (0.75–1.01)                   | 0.92 (0.78–1.08)                   | 0.70 (0.60–0.80)                   |
| 1,3-Butadiene                                        | N-Acetyl-S-(4-hydroxy-2-buten-1-yl)-L-cysteine (MHBMA3)      | 7.28 (6.03–8.79) <sup>cd</sup>  | 6.20 (5.18–7.40) <sup>cd</sup>     | 21.17 (17.31–25.88) <sup>ab</sup>  | 23.10 (19.40–27.51) <sup>ab</sup>  |
|                                                      | N-Acetyl-S-(3,4-dihydroxybutyl)-L-cysteine (DHBMA)           | 249 (220–283)                   | 240 (212–270) <sup>cd</sup>        | 251 (220–288)                      | 216 (191–243)                      |
| Crotonaldehyde                                       | N-Acetyl-S-(3-hydroxypropyl-1-methyl)-L-cysteine (HPMMA)     | 362 (305–431) <sup>cd</sup>     | 293 (249–344) <sup>cd</sup>        | 665 (554–799) <sup>ab</sup>        | 633 (540–742) <sup>ab</sup>        |
| Cyanide                                              | 2-Aminothiazoline-4-carboxylic acid (ATCA)                   | 104.7 (88.3–124.3)              | 89.0 (75.7–104.5)                  | 95.5 (79.5–114.6)                  | 93.3 (79.6–109.4)                  |
| N,N-Dimethylformamide; methyl isocyanate             | N-Acetyl-S-(N-methylcarbamoyl)-L-cysteine (AMCC)             | 97 (83–114) <sup>bcd</sup>      | 139 (119–161) <sup>acd</sup>       | 206 (174–243) <sup>ab</sup>        | 204 (176–236) <sup>ab</sup>        |
| Ethylene oxide; acrylonitrile; vinyl chloride        | N-Acetyl-S-(2-hydroxyethyl)-L-cysteine (HEMA) <sup>***</sup> | 0.67 (0.57–0.79) <sup>cd</sup>  | 0.51 (0.44–0.60) <sup>cd</sup>     | 0.99 (0.83–1.17) <sup>ab</sup>     | 0.97 (0.84–1.13) <sup>ab</sup>     |
| Propylene oxide                                      | N-Acetyl-S-(2-hydroxypropyl)-L-cysteine (2HPMA)              | 34.1 (28.5–40.8) <sup>cd</sup>  | 37.8 (31.9–44.7) <sup>c</sup>      | 55.5 (45.9–67.2) <sup>ab</sup>     | 50.0 (42.3–59.0) <sup>a</sup>      |

|                         |                                      |                                 |                                 |                                   |                                   |
|-------------------------|--------------------------------------|---------------------------------|---------------------------------|-----------------------------------|-----------------------------------|
| Styrene                 | Mandelic acid (MA)                   | 130 (113–149) <sup>c</sup>      | 111 (98–127) <sup>cd</sup>      | 175 (151–203) <sup>ab</sup>       | 158 (139–180) <sup>b</sup>        |
| Styrene, ethylbenzene   | Phenylglyoxylic acid (PGA)           | 103 (91–126)                    | 111 (94–130)                    | 125 (103–150)                     | 108 (91–126)                      |
| Toluene; benzyl alcohol | N-Acetyl-S-(benzyl)-L-cysteine (BMA) | 8.20 (6.89–9.75) <sup>bcd</sup> | 5.25 (4.45–6.18) <sup>a</sup>   | 4.72 (3.92–5.68) <sup>a</sup>     | 4.09 (3.48–4.80) <sup>a</sup>     |
| Xylene                  | 2-Methylhippuric acid (2MHA)         | 17.2 (14.4–20.5) <sup>cd</sup>  | 14.8 (12.5–17.5) <sup>cd</sup>  | 36.2 (29.9–43.7) <sup>ab</sup>    | 39.0 (33.0–45.9) <sup>ab</sup>    |
|                         | 3- + 4-Methylhippuric acids (34MHA)  | 88.6 (74.0–105.9) <sup>cd</sup> | 89.2 (75.3–105.6) <sup>cd</sup> | 206.3 (170.4–249.8) <sup>ab</sup> | 236.9 (200.6–279.7) <sup>ab</sup> |

\*Superscript letters denote statistically significant differences between study groups (sidak adjusted  $p$ -value < 0.05). Geometric means are adjusted for age, sex, race, and country of residence.

**Table S5.** Biomarkers of exposure to nicotine and selected toxicants in urine of Exclusive E-cigarette Users (n=124) from USA, UK and Poland (normalized for creatinine; geometric means, 95% confidence intervals) who used different types of vaping devices.

| Parent Compound  | Biomarker                               | Replaceable<br>cartridge model         | Refillable tank<br>model                | Other                                      | <i>p</i> -<br>value |
|------------------|-----------------------------------------|----------------------------------------|-----------------------------------------|--------------------------------------------|---------------------|
|                  |                                         | ( <i>n</i> = 9)                        | ( <i>n</i> = 93)                        | ( <i>n</i> = 22)                           |                     |
| Nicotine         | Nicotine Equivalence (nmol/mg)          | 28.35 (12.40–64.77)                    | 37.75 (28.95–<br>49.22) <sup>c</sup>    | 90.36 (50.15–<br>162.79) <sup>b</sup>      | 0.023               |
|                  | <i>trans</i> -3'-Hydroxycotinine (HCTT) | 2101.6 (878.1–<br>5029.5) <sup>c</sup> | 3324.9 (2512.3–<br>4400.1) <sup>c</sup> | 8827.4 (4740.2–<br>16438.3) <sup>a,b</sup> | 0.010               |
|                  | Cotinine (COTT)                         | 1396.4 (608.8–3202.7)                  | 1807.9 (1384.8–<br>2360.0) <sup>c</sup> | 4340.8 (2402.7–<br>7842.1) <sup>b</sup>    | 0.026               |
|                  | Nicotine (NICT)                         | 570.5 (243.1–1338.8)                   | 528.9 (402.1–<br>695.5)                 | 1161.6 (632.5–<br>2133.0)                  | 0.102               |
|                  | Cotinine N-oxide (COXT)                 | 154.24 (65.84–361.32)                  | 218.49 (166.23–<br>287.17)              | 508.98 (277.51–<br>933.48)                 | 0.030               |
|                  | Nicotine 1'-oxide (NOXT)                | 489.65 (194.49–<br>1232.7)             | 511.13 (379.99–<br>687.51)              | 1172.94 (607.53–<br>2264.5)                | 0.099               |
|                  | Norcotinine (NCTT)                      | 32.89 (14.92–72.51) <sup>c</sup>       | 45.74 (35.48–<br>58.95) <sup>c</sup>    | 109.66 (62.43–<br>192.59) <sup>a,b</sup>   | 0.015               |
|                  | Nornicotine (NNCT)                      | 24.00 (12.22–47.11)                    | 29.06 (23.40–<br>36.09) <sup>c</sup>    | 59.11 (36.56–<br>95.57) <sup>b</sup>       | 0.028               |
| Anabasine (ANBT) | Anabasine (ANBT)                        | 3.02 (1.32–6.86)                       | 1.78 (1.36–2.32)                        | 1.93 (1.07–3.47)                           | 0.529               |

|                                                     |                                                           |                        |                        |                        |       |
|-----------------------------------------------------|-----------------------------------------------------------|------------------------|------------------------|------------------------|-------|
| Anatabine (ANTT)                                    | Anatabine (ANTT)                                          | 3.14 (1.17–8.42)       | 1.03 (0.74–1.41)       | 1.12 (0.55–2.25)       | 0.131 |
| 4-methylnitrosamino)-4-(3-pyridyl)-1-butanone (NNK) | 4-methylnitrosamino)-4-(3-pyridyl)-1-butanol (NNAL)       | 4.99 (2.20–11.26)      | 3.33 (2.56–4.34)       | 4.72 (2.64–8.42)       | 0.521 |
| N'-nitrosoanabasine (NAB)                           | N'-nitrosoanabasine (NAB)                                 | 2.52 (1.37–4.60)       | 1.40 (1.14–1.70)       | 1.60 (1.03–2.45)       | 0.236 |
| N'-nitrosoanatabine (NAT)                           | N'-nitrosoanatabine (NAT)                                 | 8.08 (4.26–15.32)      | 3.23 (2.62–3.97)       | 4.04 (2.56–6.38)       | 0.046 |
| Acrolein                                            | N-Acetyl-S-(3-hydroxypropyl)-L-cysteine (3HPMA)           | 269.86 (150.96–482.38) | 242.36 (201.12–292.05) | 302.15 (199.74–457.04) | 0.686 |
|                                                     | N-Acetyl-S-(2-carboxyethyl)-L-cysteine (CEMA)             | 95.01 (54.94–164.28)   | 83.68 (70.18–99.77)    | 105.81 (71.62–156.31)  | 0.617 |
| Acrylamide                                          | N-Acetyl-S-(2-carbamoyl-ethyl)-L-cysteine (AAMA)          | 43.15 (24.16–77.06)    | 34.59 (28.71–41.67)    | 51.30 (33.93–77.54)    | 0.297 |
|                                                     | N-Acetyl-S-(2-carbamoyl-2-hydroxyethyl)-L-cysteine (GAMA) | 15.38 (9.02–26.21)     | 10.57 (8.90–12.55)     | 13.91 (9.50–20.33)     | 0.330 |
| Acrylonitrile                                       | N-Acetyl-S-(2-cyanoethyl)-L-cysteine (CYMA)               | 3.75 (1.47–9.56)       | 2.26 (1.67–3.04)       | 3.82 (1.96–7.45)       | 0.368 |
| Benzene                                             | N-Acetyl-S-(phenyl)-L-cysteine (PMA)                      | 0.83 (0.49–1.39)       | 0.83 (0.70–0.98)       | 1.07 (0.74–1.54)       | 0.497 |
| 1,3-Butadiene                                       | N-Acetyl-S-(4-hydroxy-2-buten-1-yl)-L-cysteine (MHBMA3)   | 6.99 (3.67–13.29)      | 5.75 (4.67–7.06)       | 7.50 (4.74–11.86)      | 0.617 |
|                                                     | N-Acetyl-S-(3,4-dihydroxybutyl)-L-cysteine (DHBMA)        | 213.51 (135.60–336.18) | 230.58 (199.30–266.76) | 248.88 (180.10–343.93) | 0.847 |



|                                               |                                                          |                        |                               |                                |       |
|-----------------------------------------------|----------------------------------------------------------|------------------------|-------------------------------|--------------------------------|-------|
| Crotonaldehyde                                | N-Acetyl-S-(3-hydroxypropyl-1-methyl)-L-cysteine (HPMMA) | 346.25 (210.09–570.64) | 275.75 (234.87–323.72)        | 328.26 (229.94–468.61)         | 0.612 |
| Cyanide                                       | 2-Aminothiazoline-4-carboxylic acid (ATCA)               | 95.15 (48.17–187.93)   | 79.23 (63.68–98.59)           | 85.68 (52.75–139.15)           | 0.887 |
| N,N-Dimethylformamide; methyl isocyanate      | N-Acetyl-S-(N-methylcarbamoyl)-L-cysteine (AMCC)         | 144.59 (86.21–242.52)  | 122.62 (103.85–144.77)        | 197.13 (136.37–284.96)         | 0.116 |
| Ethylene oxide; acrylonitrile; vinyl chloride | N-Acetyl-S-(2-hydroxyethyl)-L-cysteine (HEMA)**          | 0.72 (0.42–1.21)       | 0.47 (0.40–0.56)              | 0.55 (0.37–0.80)               | 0.351 |
| Propylene oxide                               | N-Acetyl-S-(2-hydroxypropyl)-L-cysteine (2HPMA)          | 43.80 (23.24–82.52)    | 36.81 (30.03–45.12)           | 36.85 (23.46–57.87)            | 0.881 |
| Styrene                                       | Mandelic acid (MA)                                       | 122.76 (74.56–202.20)  | 107.49 (91.57–126.16)         | 117.01 (82.00–166.98)          | 0.866 |
| Styrene, ethylbenzene                         | Phenylglyoxylic acid (PGA)                               | 118.31 (66.81–209.48)  | 103.89 (86.47–124.81)         | 111.23 (74.02–167.12)          | 0.911 |
| Toluene; benzyl alcohol                       | N-Acetyl-S-(benzyl)-L-cysteine (BMA)                     | 3.88 (2.12–7.10)       | 4.36 (3.59–5.30) <sup>c</sup> | 8.07 (5.24–12.41) <sup>b</sup> | 0.042 |
| Xylene                                        | 2-Methylhippuric acid (2MHA)                             | 20.19 (10.70–38.07)    | 14.14 (11.54–17.34)           | 16.99 (10.81–26.71)            | 0.572 |
|                                               | 3- + 4-Methylhippuric acids (34MHA)                      | 103.12 (55.98–189.92)  | 87.60 (72.00–106.58)          | 99.75 (64.55–154.13)           | 0.839 |

Note: <sup>a</sup> indicates statistically significant difference from replaceable cartridge; <sup>b</sup> indicates statistically difference from refillable users; <sup>c</sup> indicates statistically significant difference from “other” device users (all  $p < 0.05$ ). Reported p-values indicate findings from omnibus statistic; superscript letter notation reflects findings adjusted for multiple comparisons (sidak). Geometric means are adjusted for urinary creatinine, age, sex, race, and country of residence.
